# Supplementary material for: Die Klassenwiederholung als kritisches Lebensereignis für das Wohlbefinden von Schulkindern an weiterführenden Schulen?
Source: Springer Nature journal article supplement (doi:10.1007/s11553-021-00907-z), 2021-10-14
Supplement: MOESM1 [file 19758744]

**Appendix**

**Tabelle 1A.** Stichprobenzusammensetzung: Schulkinder ohne und mit Erfahrung der Rückversetzung.

|  | Vergleichsgruppe  (erste Beobachtung)  (N = 3.175) | Rückversetzte Schüler  (erste Beobachtung)  (N = 516) | Rückversetzte Schüler (letzte Beobachtung vor der Rückversetzung)  (N = 516) |
| --- | --- | --- | --- |
| ***Wohlbefinden*** | 8,36 (1,63) | 8,03 (1,88) | 7,56 (1,70) |
| *Zufriedenheit mit:* |  |  |  |
| - Leben | 7,92 (2,31) | 7,58 (2,52) | 7,15 (2,26) |
| - Lebensstandard | 8,51 (2,15) | 8,31 (2,41) | 7,98 (2,19) |
| - Gesundheit | 8,64 (2,17) | 8,27 (2,59) | 7,87 (2,42) |
| - Familienleben | 8,95 (2,07) | 8,60 (2,43) | 8,11 (2,37) |
| - Bekannten/Freunden | 8,83 (1,97) | 8,64 (2,21) | 8,37 (2,10) |
| - Schulischer Situation | 7,33 (2,51) | 6,83 (2,69) | 5.86 (2.49) |
| ***Zeitkonstante Schulform (Gruppenvariable)*** |  |  |  |
| - Hauptschule | 13% (N = 424)  (Wohlbefinden: 8,06) | 9% (N = 46)  (Wohlbefinden: 7,96) | 9% (N = 46)  (Wohlbefinden: 7,59) |
| - Schule mit mehreren   Bildungsgängen | 15% (N = 471)  (Wohlbefinden: 8,09) | 9% (N = 47) (Wohlbefinden: 7,80) | 9% (N = 47) (Wohlbefinden: 7,33) |
| - Realschule | 22% (N = 715)  (Wohlbefinden: 8,21) | 29% (N = 149)  (Wohlbefinden: 7,93) | 29% (N = 149)  (Wohlbefinden: 7,58) |
| - Gymnasium | 43% (N = 1.385)  (Wohlbefinden: 8,67) | 39% (N = 204)  (Wohlbefinden: 8,24) | 39% (N = 204)  (Wohlbefinden: 7,62) |
| - Wechsel der Schulform | 7% (N = 180)  (Wohlbefinden: 8,17) | 14% (N = 70)  (Wohlbefinden: 8,00) | 14% (N = 70)  (Wohlbefinden: 7,42) |
| - Abwärtsmobilität | (N = 116)  (Wohlbefinden: 8,20) | (N = 40)  (Wohlbefinden: 8,07) | (N = 40)  (Wohlbefinden: 7,02) |
| - Aufwärtsmobilität | (N = 64)  (Wohlbefinden: 8,11) | (N = 30)  (Wohlbefinden: 7,90) | (N = 30)  (Wohlbefinden: 7,95) |
| ***Zeitveränderliche Kovariaten*** |  |  |  |
| Alter | 11,87 (1,11) | 11.59 (0.98) | 13.82 (1.52) |
| Subjektive Gesundheit | 3,27 (0,75) | 3.14 (0.82) | 3.05 (0.86) |
| In Ausbildung | 0% (N = 1) | 0% (N = 0) | 0% (N = 0) |
| Schulformwechsel | 0% (N = 0) | 0% (N = 0) | 43% (N = 30 von 70) |
| Paneldropout | 0% (N = 11) | 0% (N = 0) | 0% (N = 0) |
| *Notiz:* Mittelwerte (und Standardabweichungen), ungewichtete Anteile in %. | | | |

**Tabelle 2A**: Fixed-Effects Regressionen für das Wohlbefinden, differenziert

nach Schulform

|  | **Model 1**  Hauptschule | | **Model 2**  Schule mit mehreren Bildungsgängen | | **Model 3**  Realschule | |
| --- | --- | --- | --- | --- | --- | --- |
|  |  | |  | |  | |
| *D1:* Jahr der Rückversetzung |  | -0,22 (0,32) |  | -0,01 (0,23) |  | -0,10 (0,13) |
| *D2:* Jahr der Klassenwiederholung |  | -0,11 (0,23) |  | 0,13 (0,20) |  | 0,29 (0,13)* |
| *D3:*  +1 |  | -0,17 (0,20) |  | 0,09 (0,25) |  | 0,36 (0,14)** |
| *D4:* +2 |  | 0,46 (0,31) |  | 0,39 (0,28) |  | 0,40 (0,16)** |
| *D5:* Später (bis max. +5 Jahre) |  | 0,20 (0,27) |  | 0,85 (0,40)* |  | 0,91 (0,22)*** |
| Alter (linear) |  | -0,17 (0,18) |  | -0,55 (0,16)*** |  | -0,34 (0,12)** |
| Alter (quadratisch) |  | 0,02 (0,04) |  | 0,10 (0,04)** |  | 0,05 (0,03)* |
| Alter (kubisch) |  | -0,00 (0,00) |  | -0,01 (0,00)* |  | -0,00 (0,00) |
| Subjektive Gesundheit |  | 0,47 (0,05)*** |  | 0,61 (0,05)*** |  | 0,57 (0,03)*** |
| In Ausbildung |  | 0,35 (0,11)** |  | 0,71 (0,11)*** |  | 0,42 (0,07)*** |
| Schulformwechsel |  | --- |  | --- |  | --- |
| Paneldropout |  | -0,08 (0,20) |  | 0,16 (0,16) |  | -0,10 (0,10) |
|  |  | |  | |  | |
| *Fallzahlen & R-Quadrat* |  | |  | |  | |
| Anzahl an Personenjahre | N = 2.393 | | N = 2.916 | | N = 5.514 | |
| Anzahl an Schulkindern | N = 470 | | N = 518 | | N = 864 | |
| R-Quadrat ‚within‘ | 0,087 | | 0,127 | | 0,123 | |
|  | **Model 4**  Gymnasium | | **Model 5**  Abwärtsmobilität | | **Model 6**  Aufwärtsmobilität | |
|  |  | |  | |  | |
| *D1:* Jahr der Rückversetzung |  | -0,16 (0,11) |  | 0,13 (0,25) |  | -0,92 (0,36)** |
| *D2:* Jahr der Klassenwiederholung |  | 0,17 (0,11) |  | 0,09 (0,23) |  | -0,16 (0,32) |
| *D3:*  +1 |  | 0,42 (0,13)*** |  | 0,54 (0,28) |  | 0,15 (0,27) |
| *D4:* +2 |  | 0,46 (0,15)*** |  | 0,75 (0,28)** |  | -0,04 (0,35) |
| *D5:* Später (bis max. +5 Jahre) |  | 0,52 (0,19)** |  | 0,82 (0,30)** |  | 0,63 (0,38) |
| Alter (linear) |  | -0,50 (0,07)*** |  | -1,30 (024)*** |  | -0,29 (0,38) |
| Alter (quadratisch) |  | 0,07 (0,02)*** |  | 0,26 (0,05)*** |  | 0,04 (0,08) |
| Alter (kubisch) |  | -0,00 (0,00)*** |  | -0,02 (0,00)*** |  | -0,00 (0,00) |
| Subjektive Gesundheit |  | 0,61 (0,03)*** |  | 0,68 (0,07)*** |  | 0,53 (0,11)*** |
| In Ausbildung |  | 0,78 (0,12)*** |  | 0,14 (0,14) |  | 0,59 (0,23)** |
| Schulformwechsel |  | --- |  | 0,54 (0,15)*** |  | -0,07 (0,23) |
| Paneldropout |  | 0,21 (0,14) |  | 1,01 (0,40)** |  | 0,05 (0,31) |
|  |  | |  | |  | |
| *Fallzahlen & R-Quadrat* |  | |  | |  | |
| Anzahl an Personenjahre | N = 11.179 | | N = 1.046 | | N = 594 | |
| Anzahl an Schulkindern | N = 1.589 | | N = 156 | | N = 94 | |
| R-Quadrat ‚within‘ | 0,186 | | 0,222 | | 0,147 | |
| *Notiz*: **p* < .05. ***p* < .01. ****p* < .001. | | | | | | |
